# Supplementary material for: Influence of PNIPAm on log Kf of a copolymerized 2,2′-bipyridine: revised bifunctional ligand design for ratiometric metal-ion sensing
Source: Royal Society of Chemistry journal article supplement (doi:10.1039/c5dt01688f), 2015-01-01
Supplement: c5dt01688f1.pdf [file c5dt01688f1.pdf]

**Influence of PNIPAm on log  $K_f$  of a copolymerized 2,2'-bipyridine: revised  
bifunctional ligand for ratiometric metal-ion sensing**

Justin O. Massing and Roy P. Planalp  
Department of Chemistry, University of New Hampshire  
Durham, NH 03824, United States

**Supplementary Information**

- |                                                                              |                |
|------------------------------------------------------------------------------|----------------|
| <b>1. <math>^1\text{H}</math> and <math>^{13}\text{C}</math> NMR spectra</b> | <b>S2–S6</b>   |
| <b>2. Potentiometric titrations</b>                                          | <b>S7–S14</b>  |
| <b>3. Van 't Hoff plots</b>                                                  | <b>S15–S18</b> |

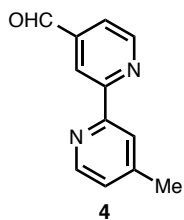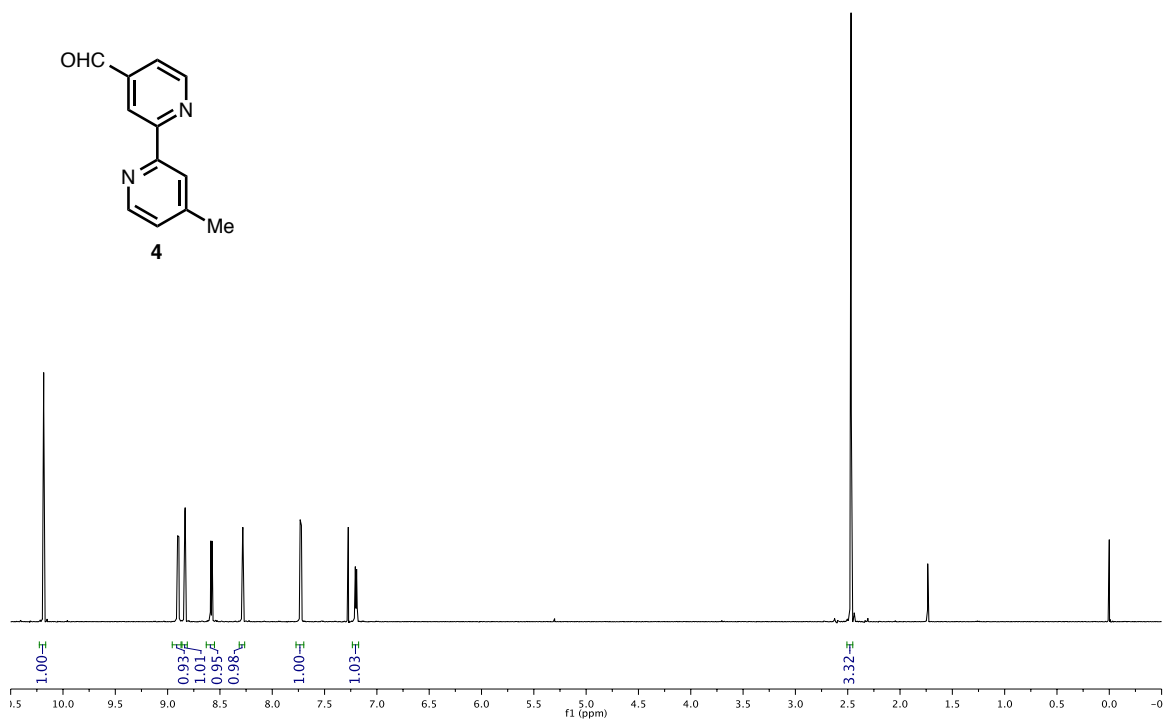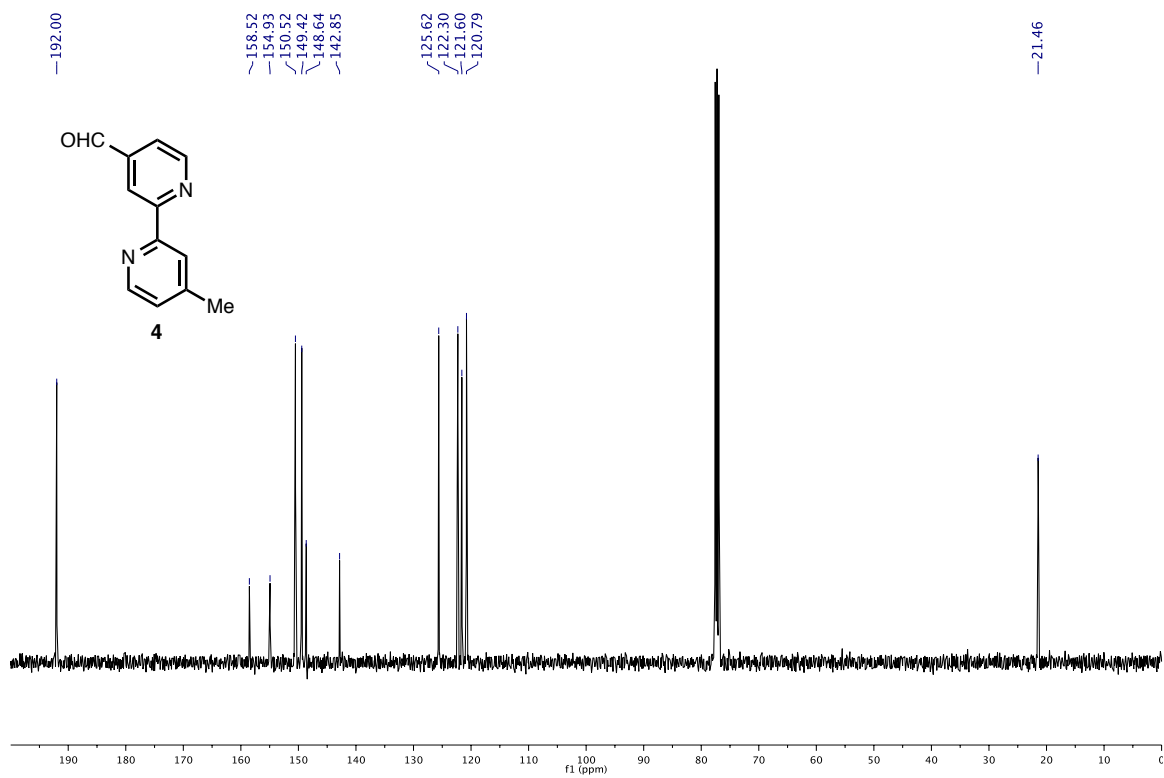

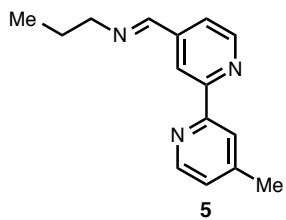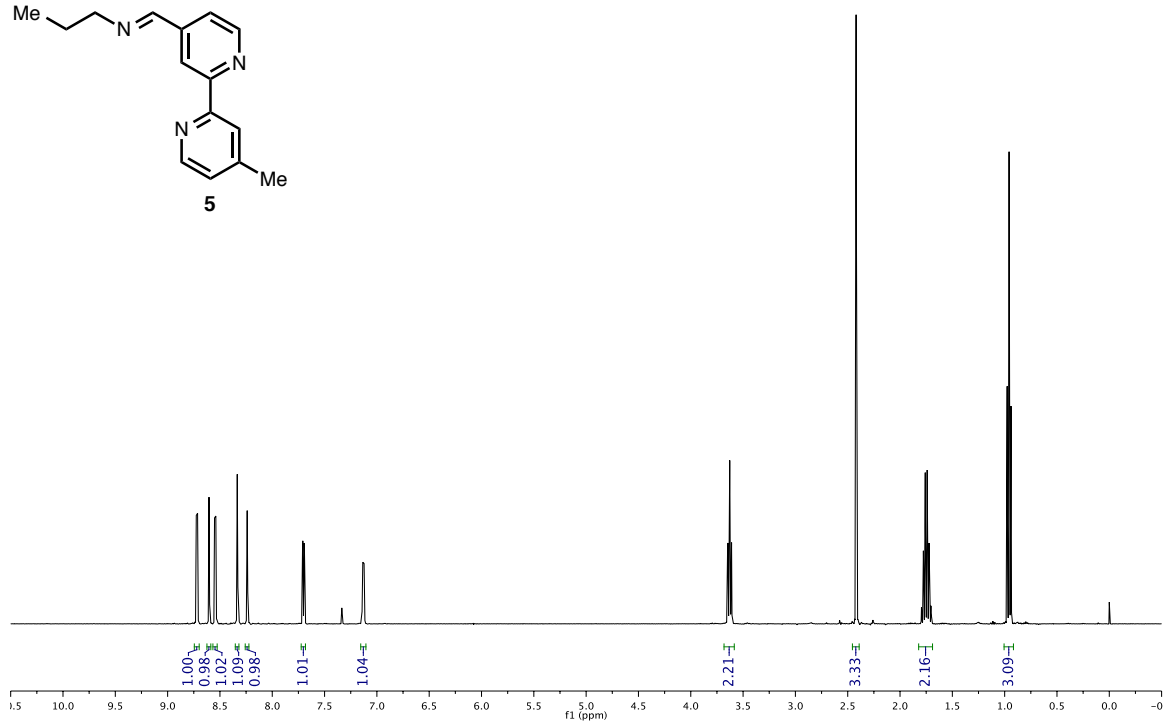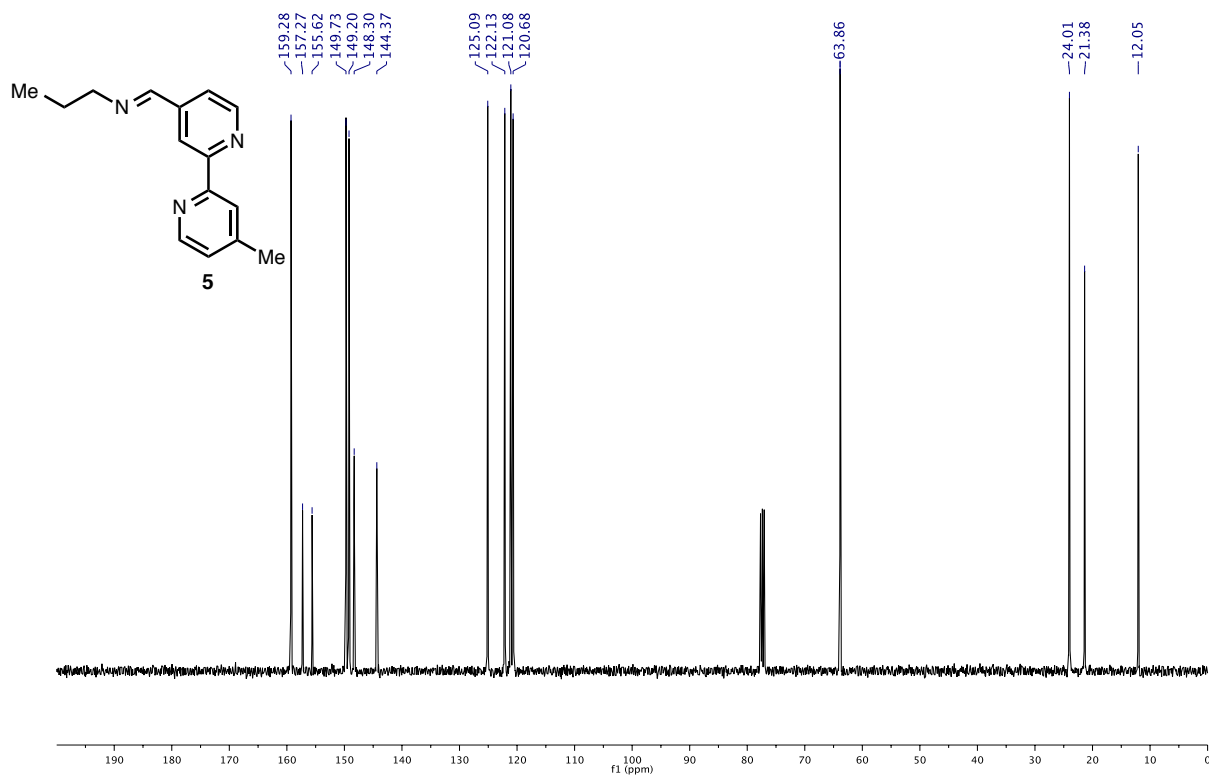

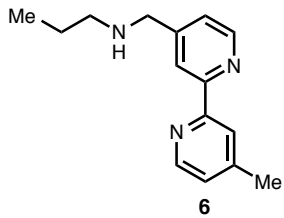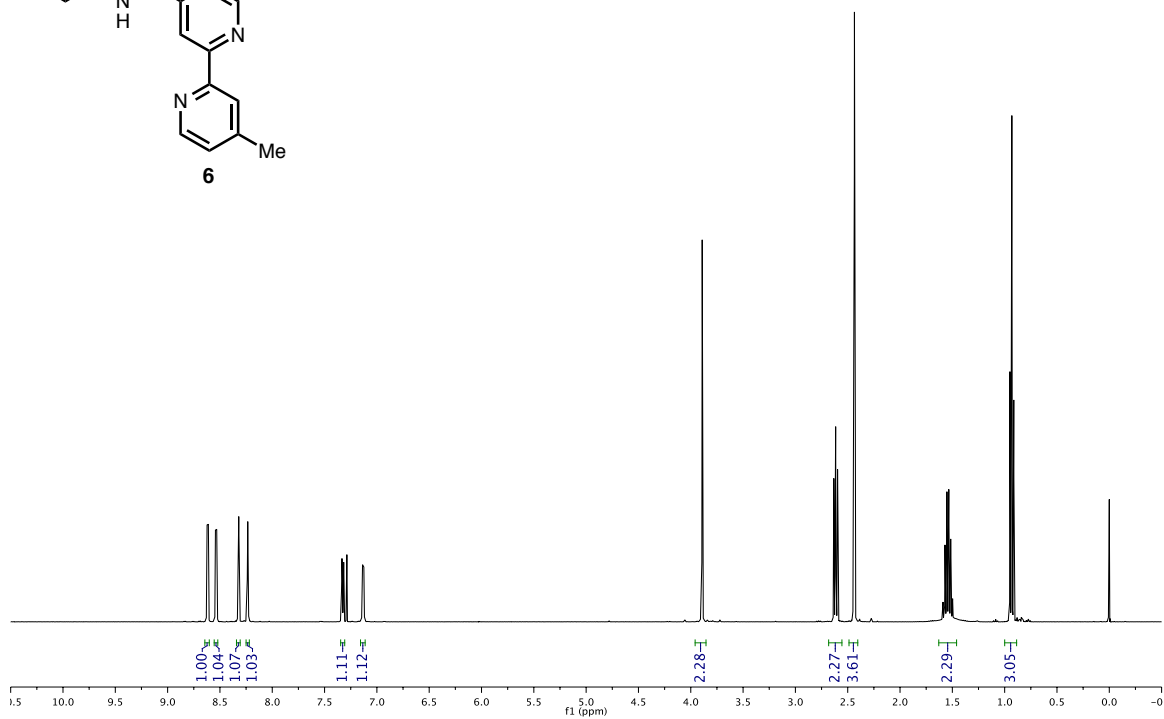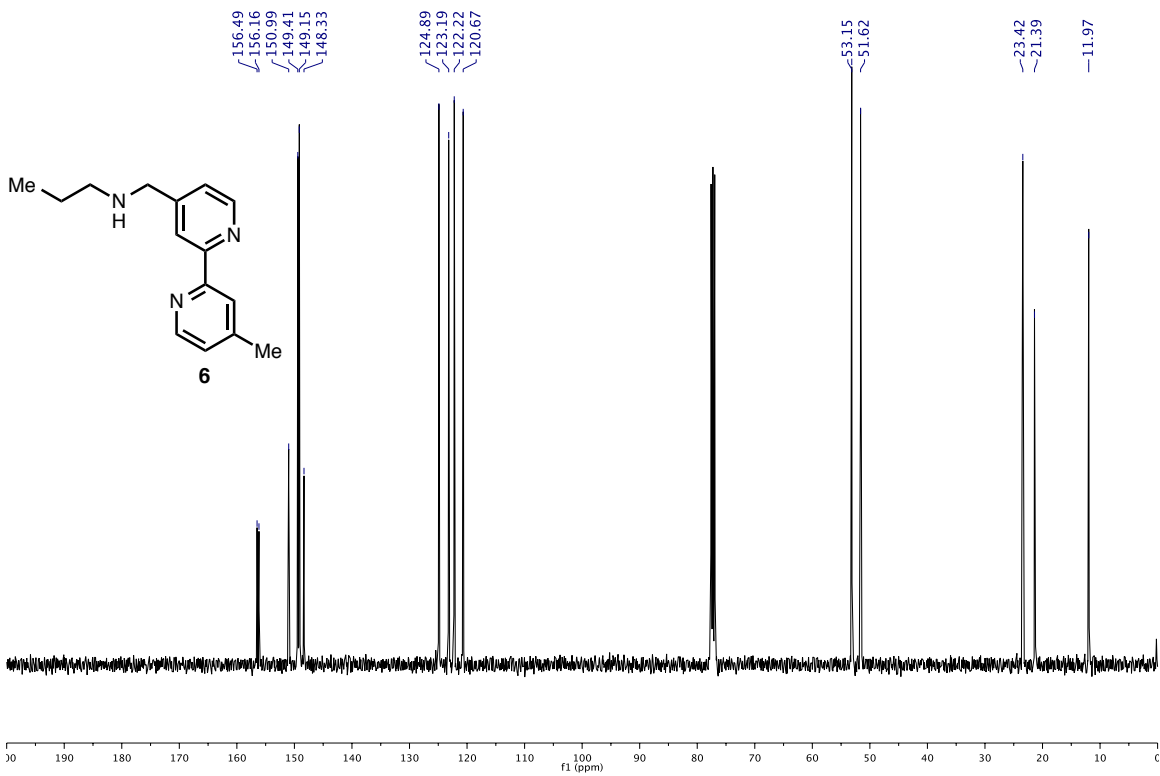

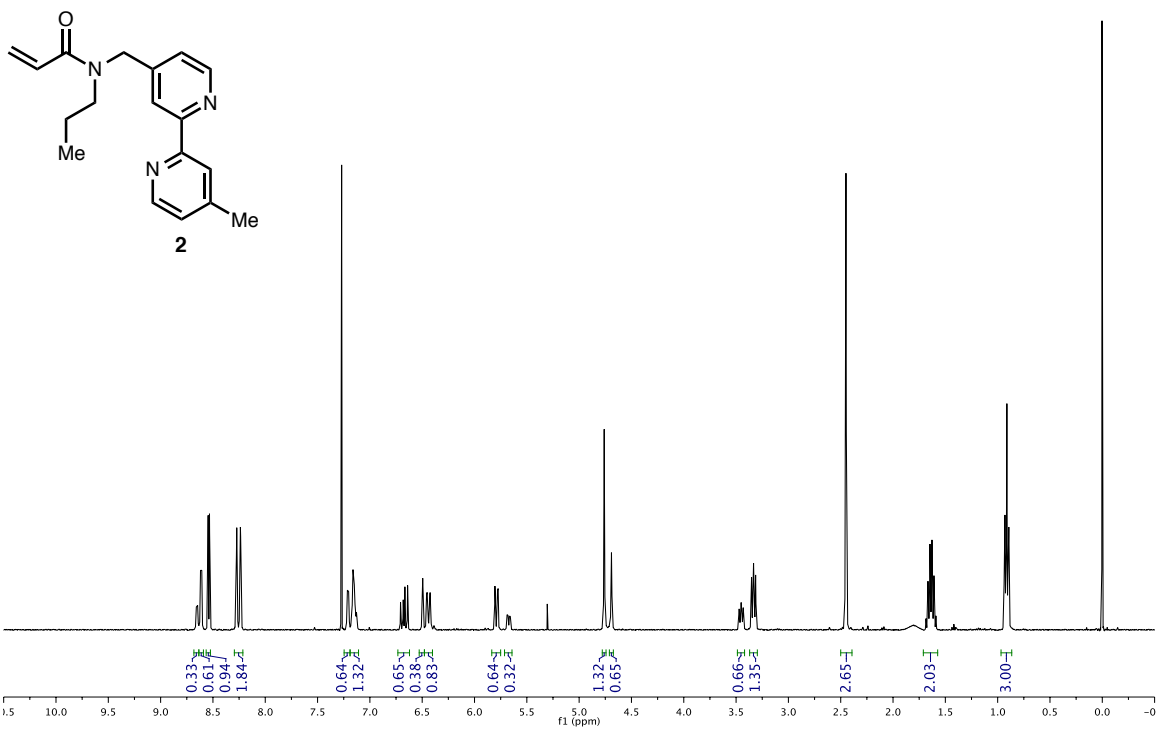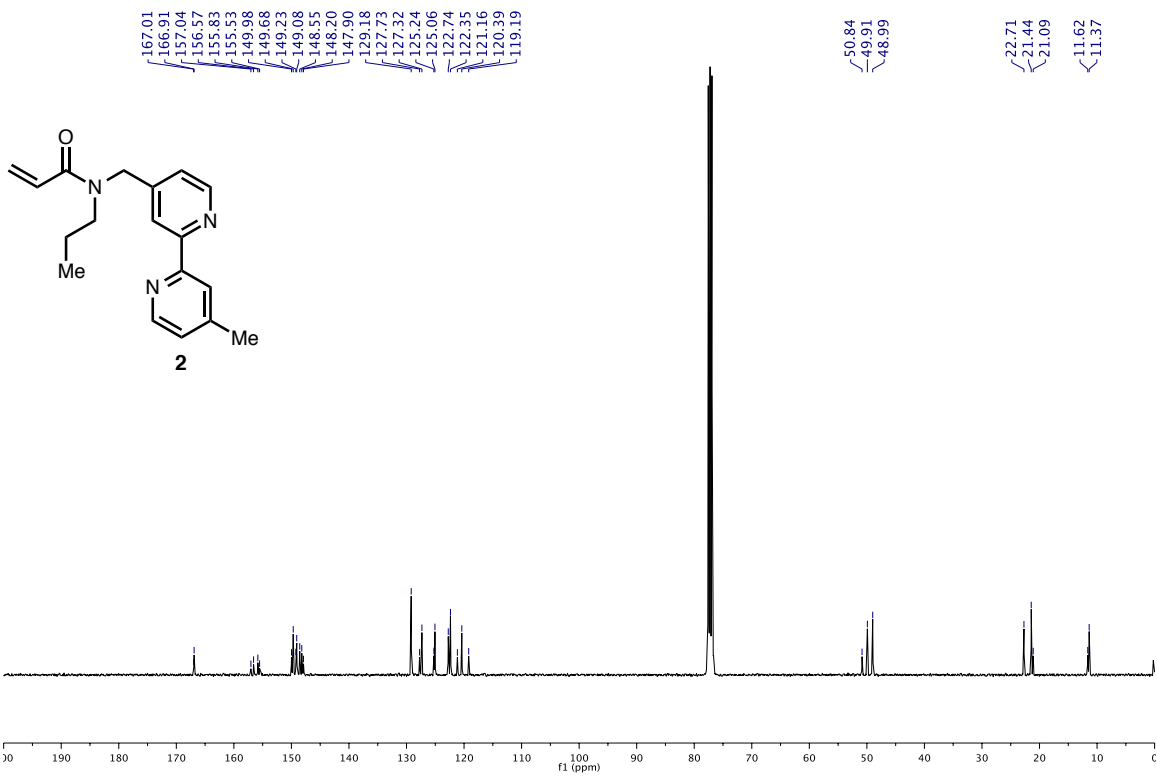

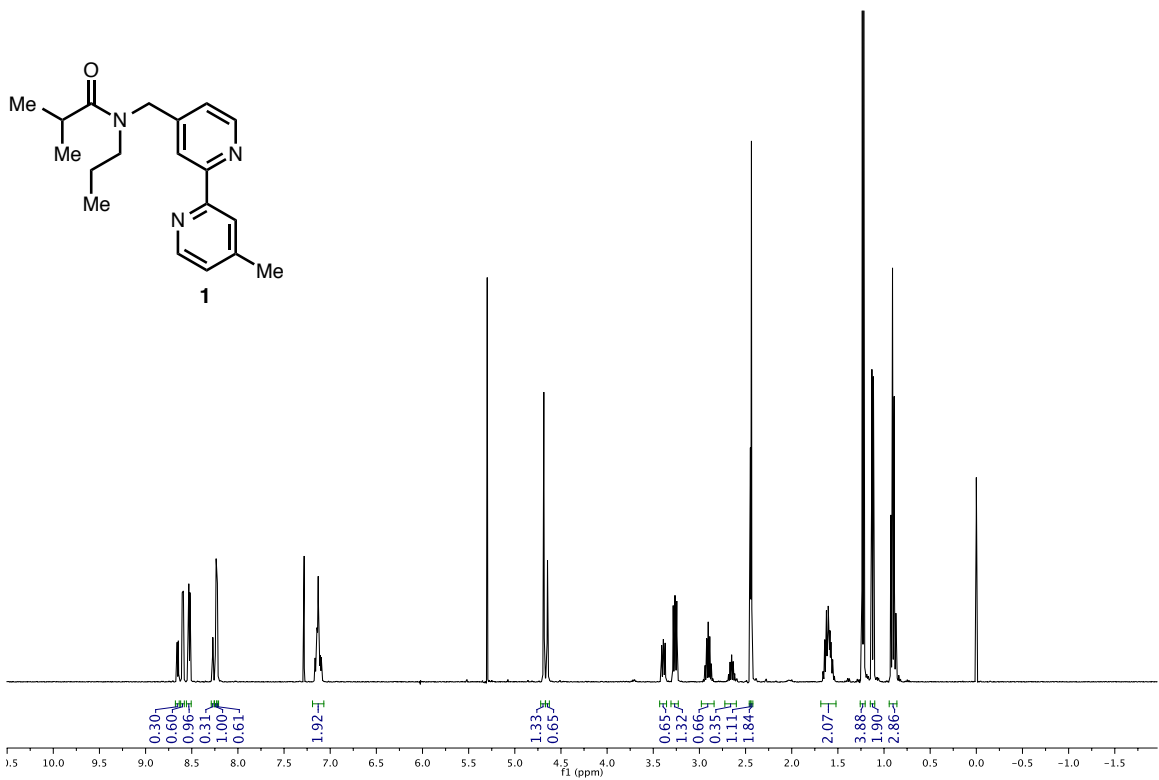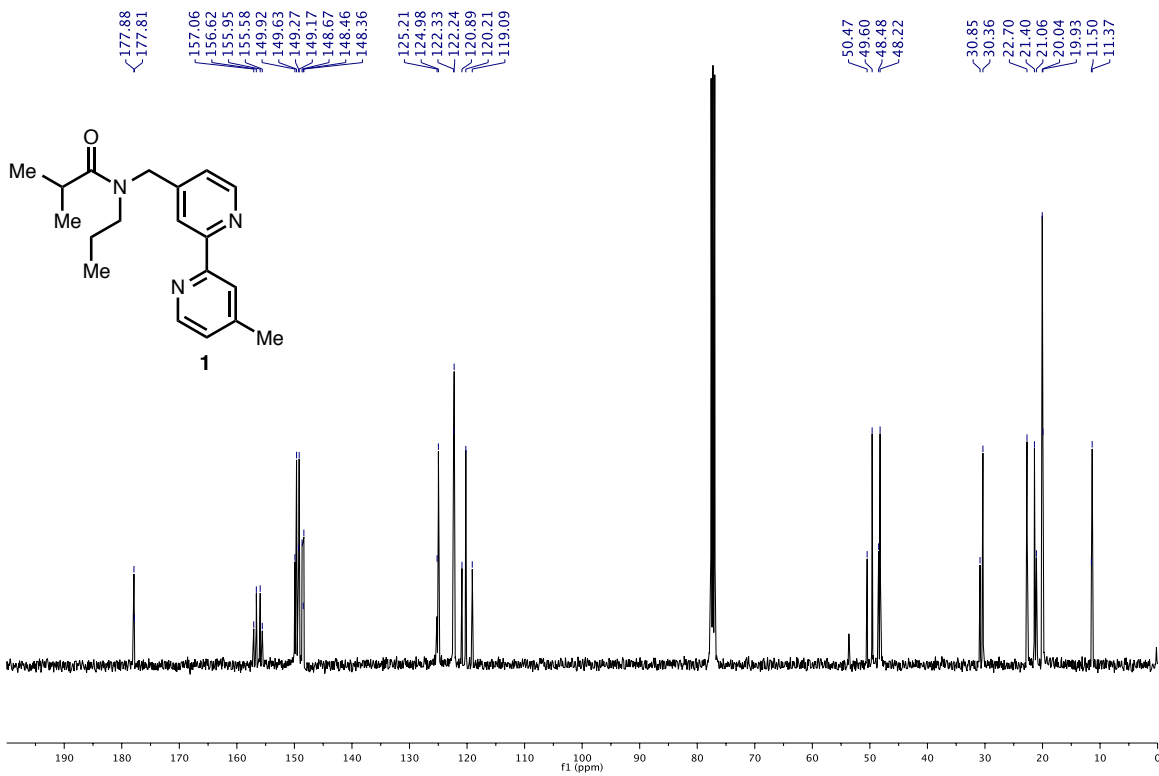

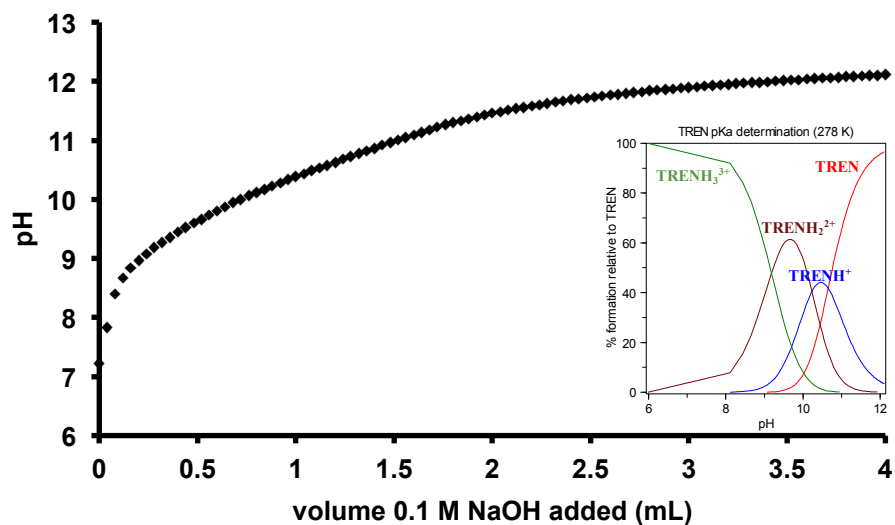

Figure S1. Potentiometric titration of 1.0 mM TREN·3HCl with NaOH at 5 °C in 0.1 M NaNO<sub>3</sub>. Corresponding distribution diagram (inset).

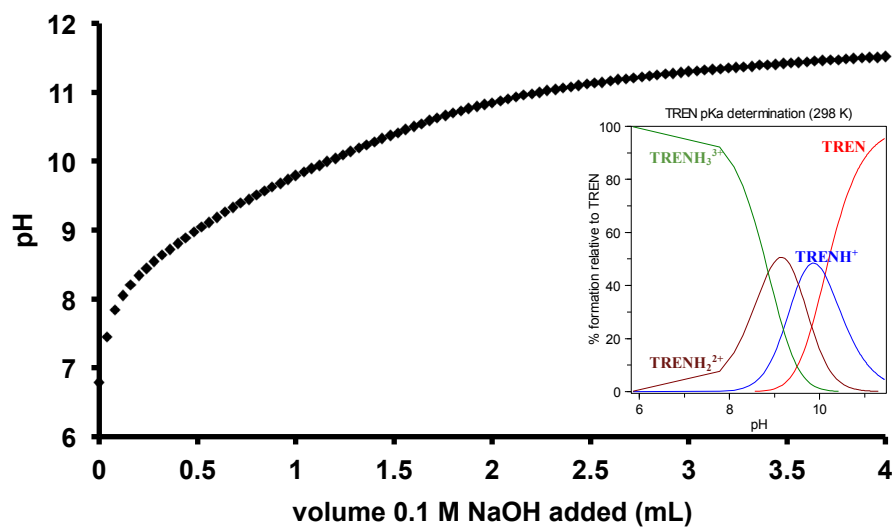

Figure S2. Potentiometric titration of 1.0 mM TREN·3HCl with NaOH at 25 °C in 0.1 M NaNO<sub>3</sub>. Corresponding distribution diagram (inset).

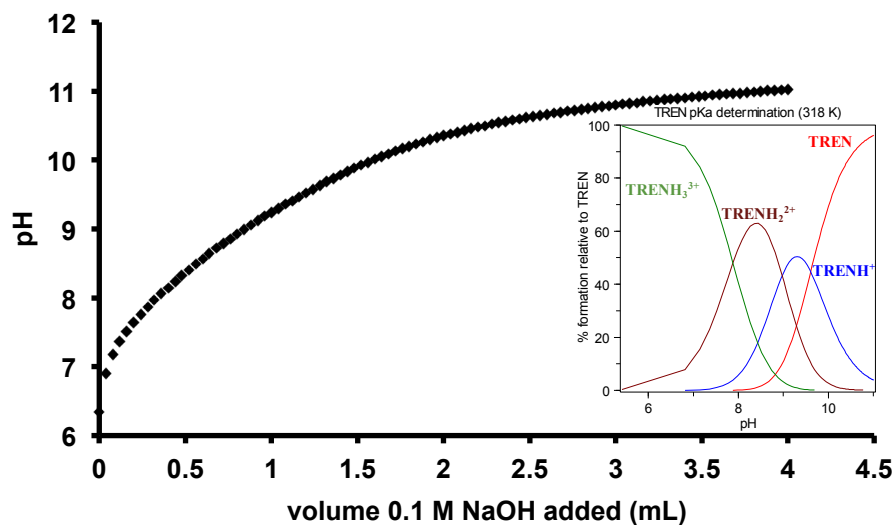

Figure S3. Potentiometric titration of 1.0 mM TREN·3HCl with NaOH at 45 °C in 0.1 M NaNO<sub>3</sub>. Corresponding distribution diagram (inset).

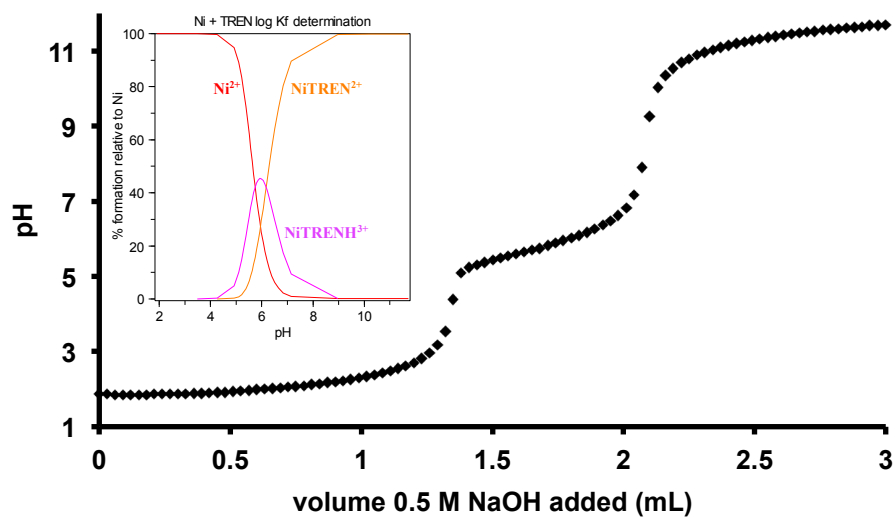

Figure S4. Potentiometric titration of 12.7 mM HNO<sub>3</sub> and equimolar (2.4 mM) TREN·3HCl and Ni(NO<sub>3</sub>)<sub>2</sub>·6H<sub>2</sub>O with NaOH at 25 °C in 0.1 M NaNO<sub>3</sub>. Corresponding distribution diagram (inset).



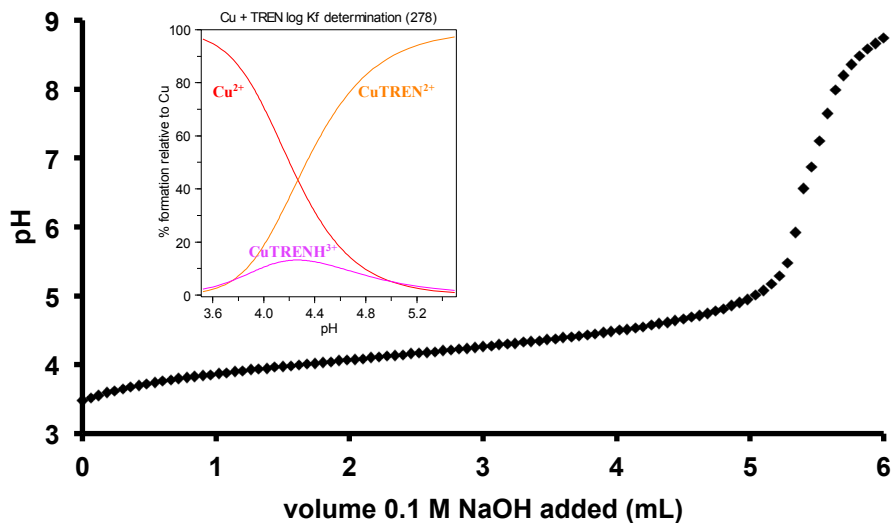

Figure S5. Potentiometric titration of equimolar (3.6 mM) TREN·3HCl and Cu(NO<sub>3</sub>)<sub>2</sub>·3H<sub>2</sub>O with NaOH at 5 °C in 0.1 M NaNO<sub>3</sub>. Corresponding distribution diagram (inset).

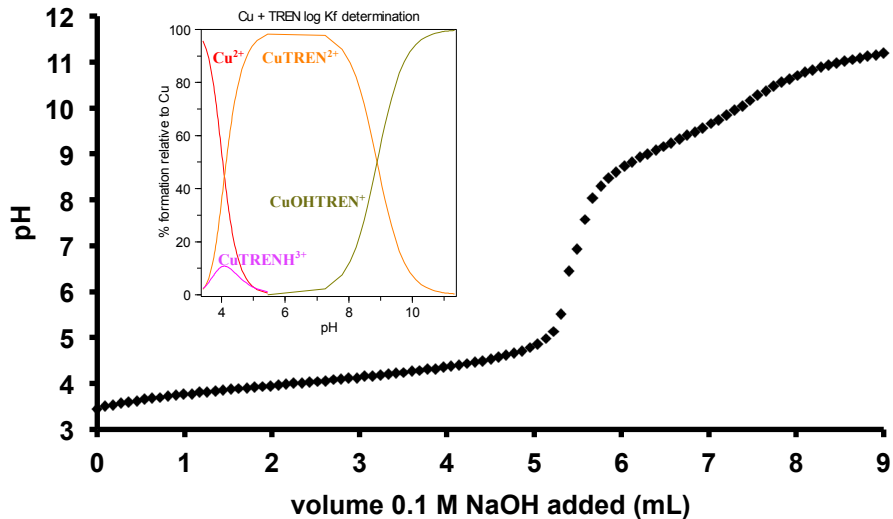

Figure S6. Potentiometric titration of equimolar (3.6 mM) TREN·3HCl and Cu(NO<sub>3</sub>)<sub>2</sub>·3H<sub>2</sub>O with NaOH at 25 °C in 0.1 M NaNO<sub>3</sub>. Corresponding distribution diagram (inset).

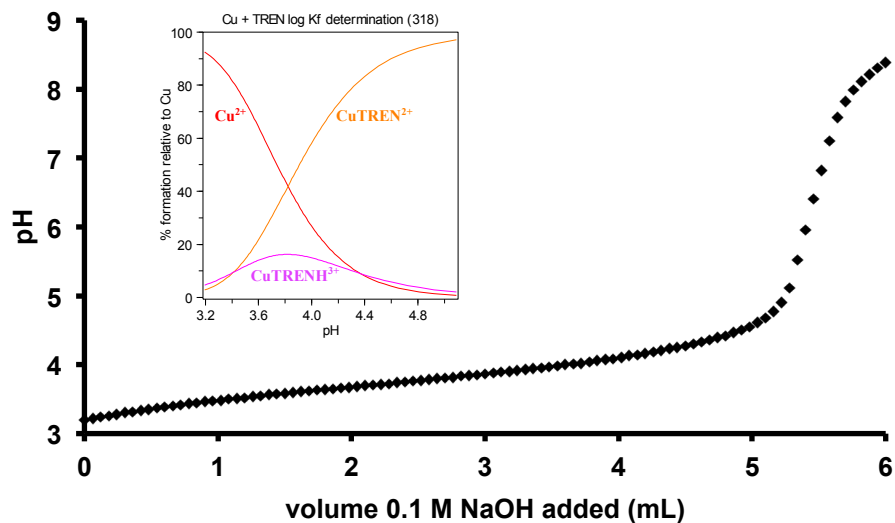

Figure S7. Potentiometric titration of equimolar (3.6 mM) TREN·3HCl and  $\text{Cu}(\text{NO}_3)_2 \cdot 3\text{H}_2\text{O}$  with NaOH at 45 °C in 0.1 M  $\text{NaNO}_3$ . Corresponding distribution diagram (inset).

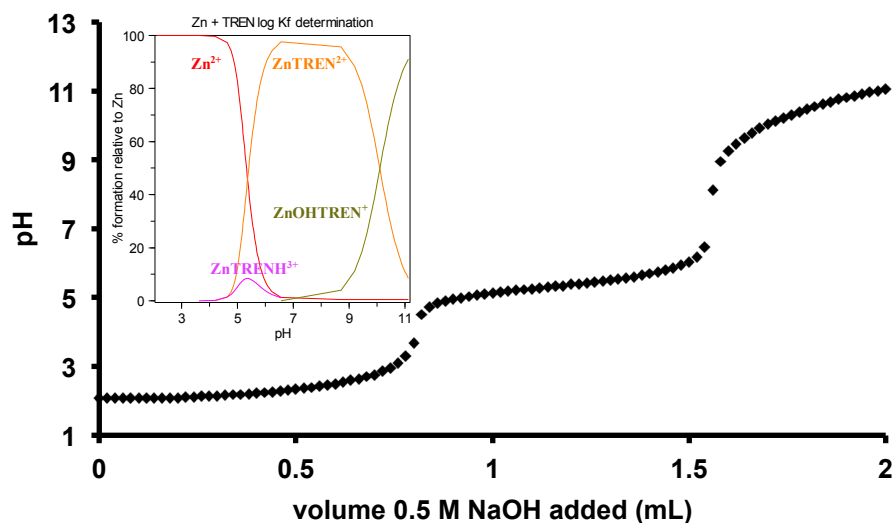

Figure S8. Potentiometric titration of 7.7 mM  $\text{HNO}_3$  and equimolar (2.4 mM) TREN·3HCl and  $\text{Zn}(\text{NO}_3)_2 \cdot 6\text{H}_2\text{O}$  with NaOH at 25 °C in 0.1 M  $\text{NaNO}_3$ . Corresponding distribution diagram (inset).

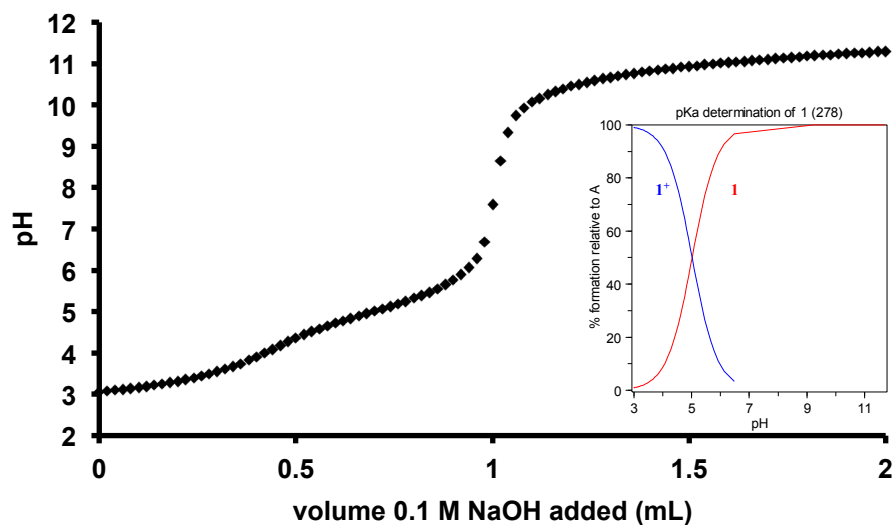

Figure S9. Potentiometric titration of 1.0 mM **1** and two equivalents of HNO<sub>3</sub> with NaOH at 5 °C in 0.1 M NaNO<sub>3</sub>. Corresponding distribution diagram (inset).

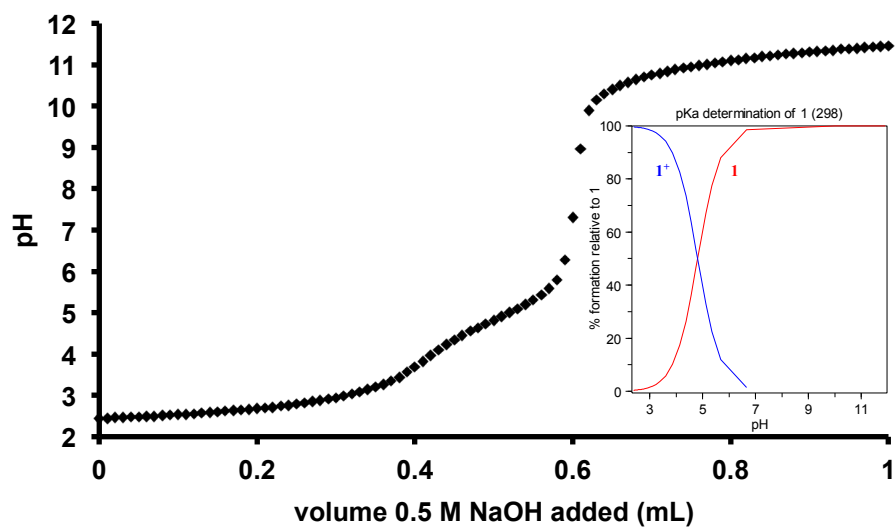

Figure S10. Potentiometric titration of 1.9 mM **1** and three equivalents of HNO<sub>3</sub> with NaOH at 25 °C in 0.1 M NaNO<sub>3</sub>. Corresponding distribution diagram (inset).

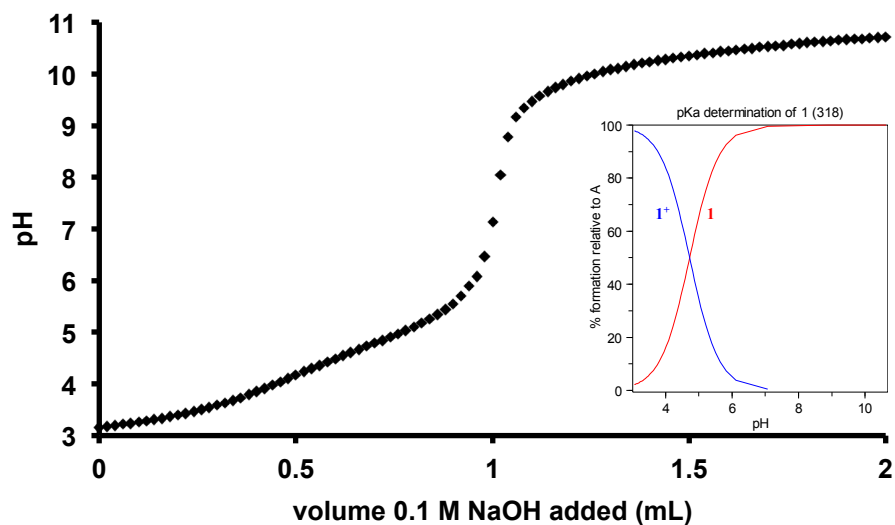

Figure S11. Potentiometric titration of 1.0 mM **1** and two equivalents of HNO<sub>3</sub> with NaOH at 45 °C in 0.1 M NaNO<sub>3</sub>. Corresponding distribution diagram (inset).

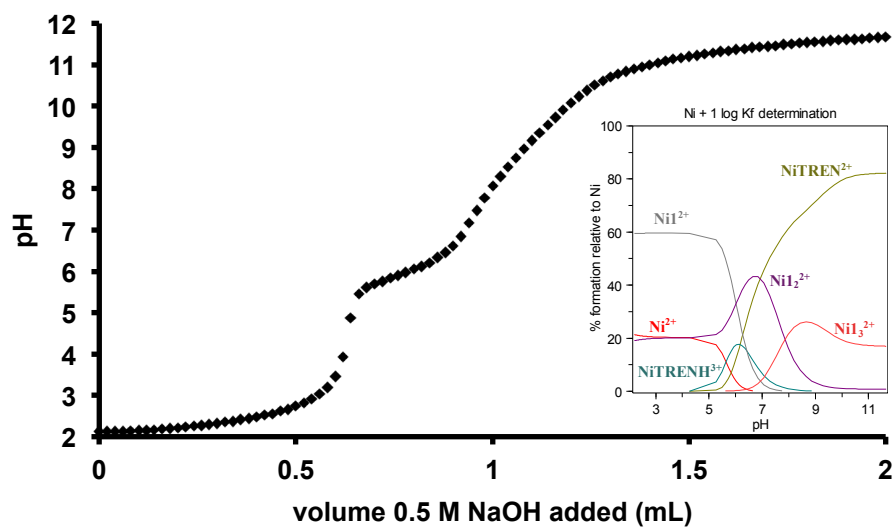

Figure S12. Potentiometric titration of equimolar (1.8 mM) **1**, TREN·3HCl, and Ni(NO<sub>3</sub>)<sub>2</sub>·6H<sub>2</sub>O with NaOH at 25 °C in 0.1 M NaNO<sub>3</sub>. Corresponding distribution diagram (inset).

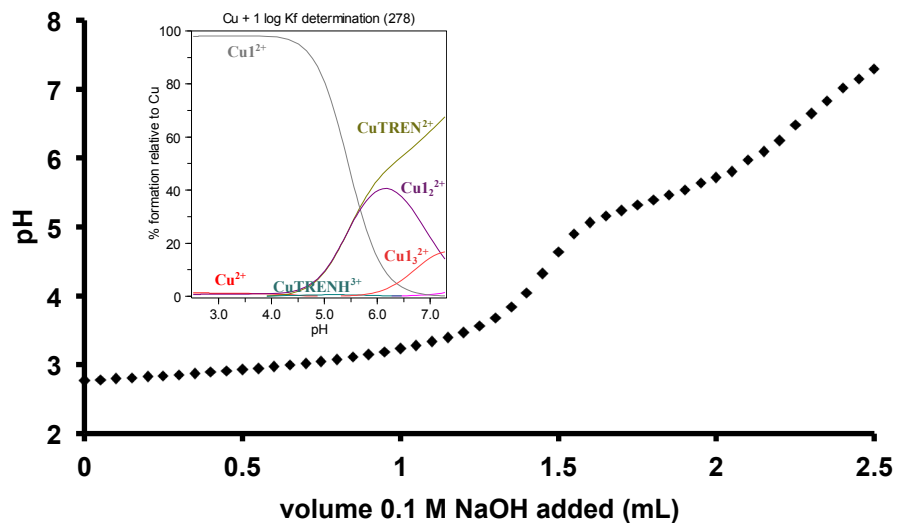

Figure S13. Potentiometric titration of equimolar (1.0 mM) **1**, TREN·3HCl, and  $\text{Cu}(\text{NO}_3)_2 \cdot 3\text{H}_2\text{O}$  with NaOH at 5 °C in 0.1 M  $\text{NaNO}_3$ . Corresponding distribution diagram (inset).

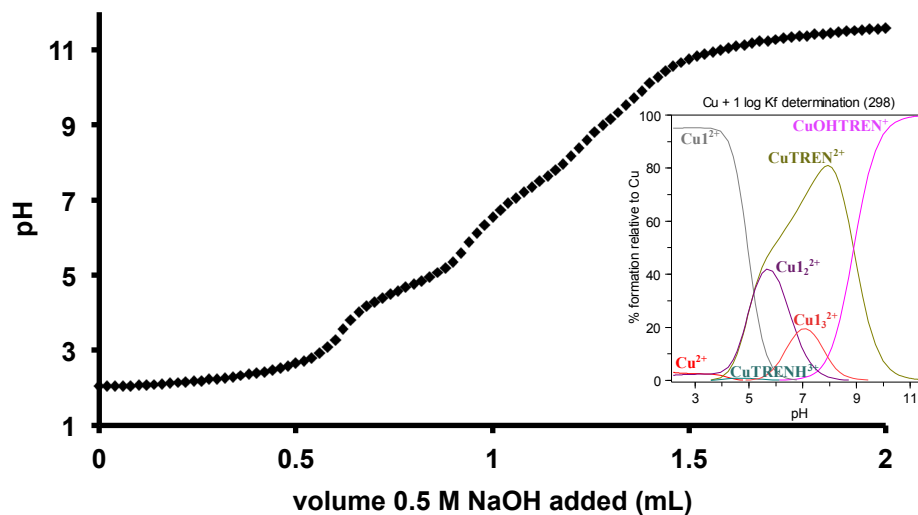

Figure S14. Potentiometric titration of equimolar (1.8 mM) **1**, TREN·3HCl, and  $\text{Cu}(\text{NO}_3)_2 \cdot 3\text{H}_2\text{O}$  with NaOH at 25 °C in 0.1 M  $\text{NaNO}_3$ . Corresponding distribution diagram (inset).

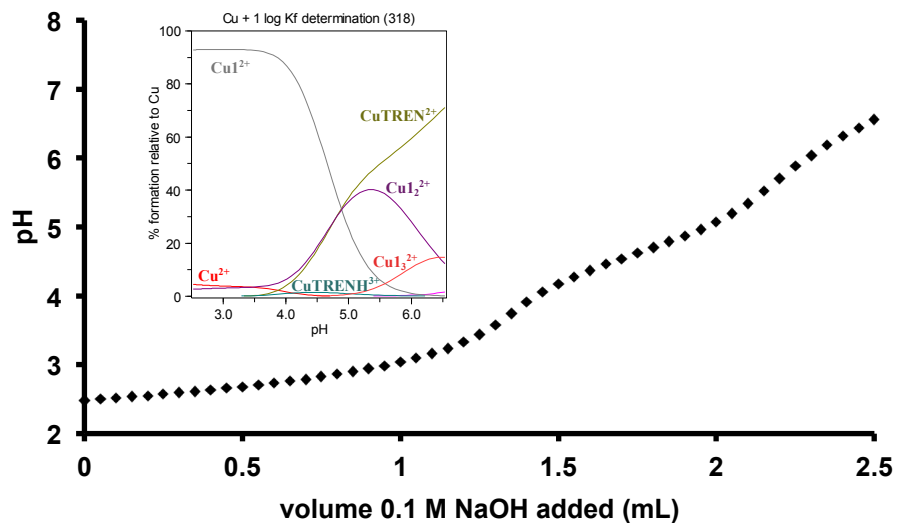

Figure S15. Potentiometric titration of equimolar (1.0 mM) **1**, TREN·3HCl, and Cu(NO<sub>3</sub>)<sub>2</sub>·3H<sub>2</sub>O with NaOH at 45 °C in 0.1 M NaNO<sub>3</sub>. Corresponding distribution diagram (inset).

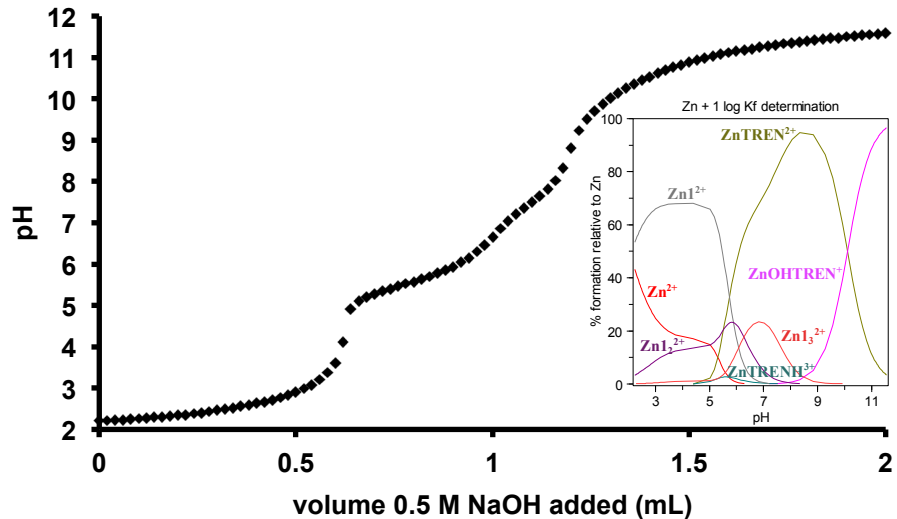

Figure S16. Potentiometric titration of equimolar (1.8 mM) **1**, TREN·3HCl, and Zn(NO<sub>3</sub>)<sub>2</sub>·6H<sub>2</sub>O with NaOH at 25 °C in 0.1 M NaNO<sub>3</sub>. Corresponding distribution diagram (inset).

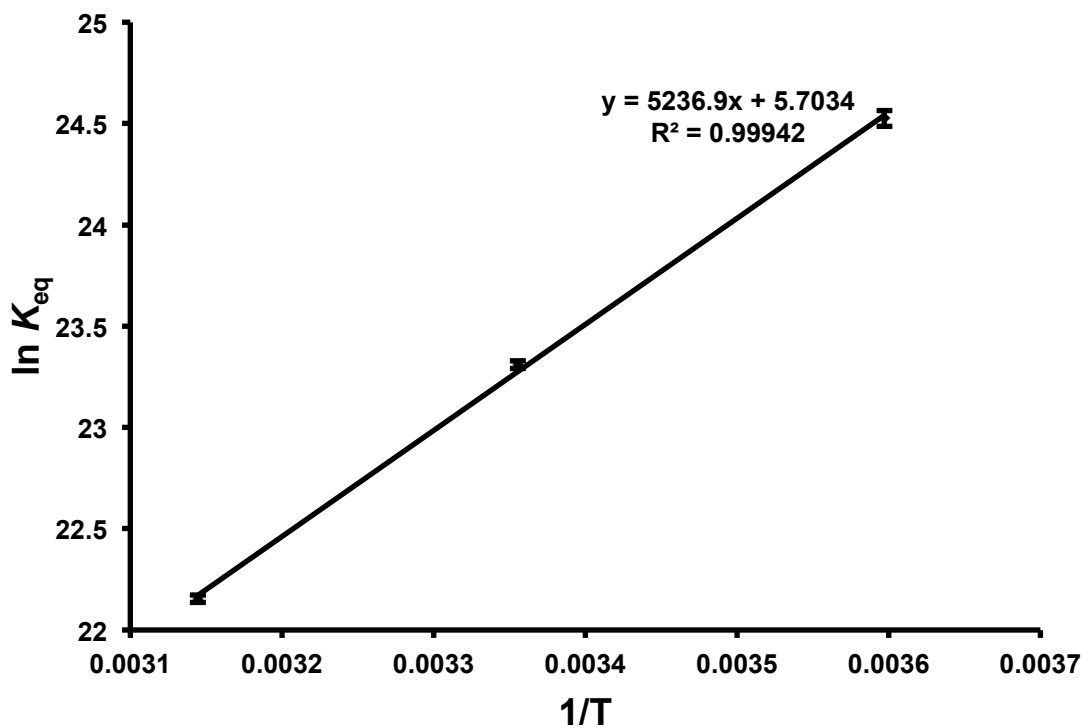

Figure S17. Van 't Hoff plot for TRENH<sup>+</sup>.

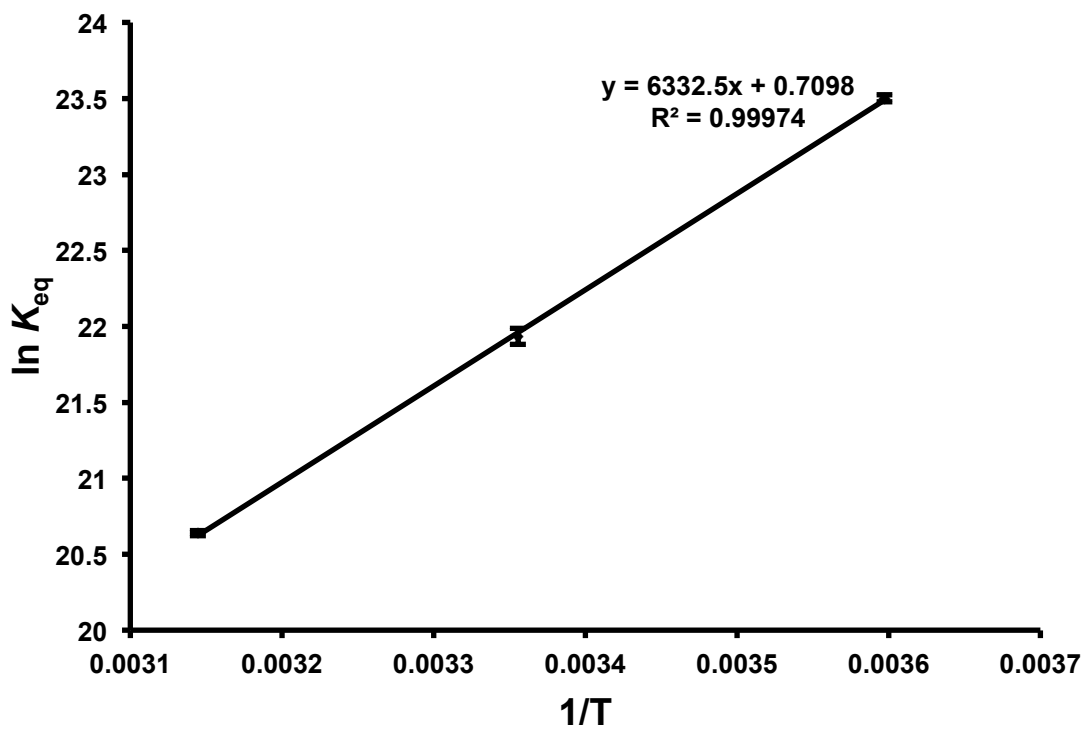

Figure S18. Van 't Hoff plot for TRENH<sub>2</sub><sup>2+</sup>.

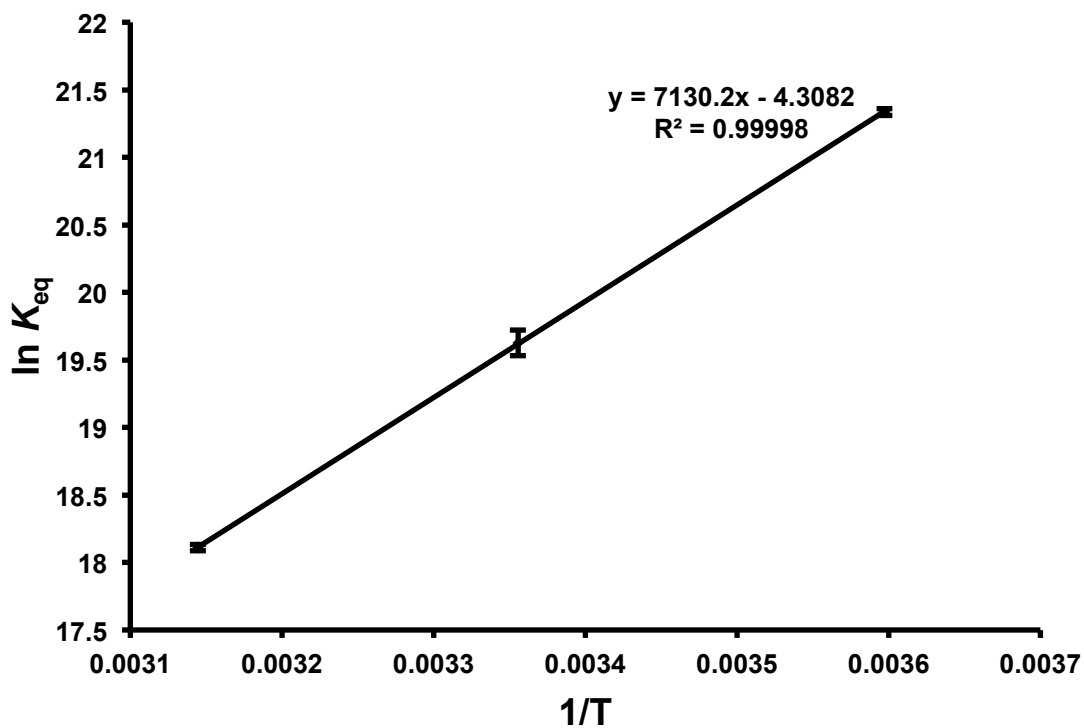

Figure S19. Van 't Hoff plot for  $\text{TRENH}_3^{3+}$ .

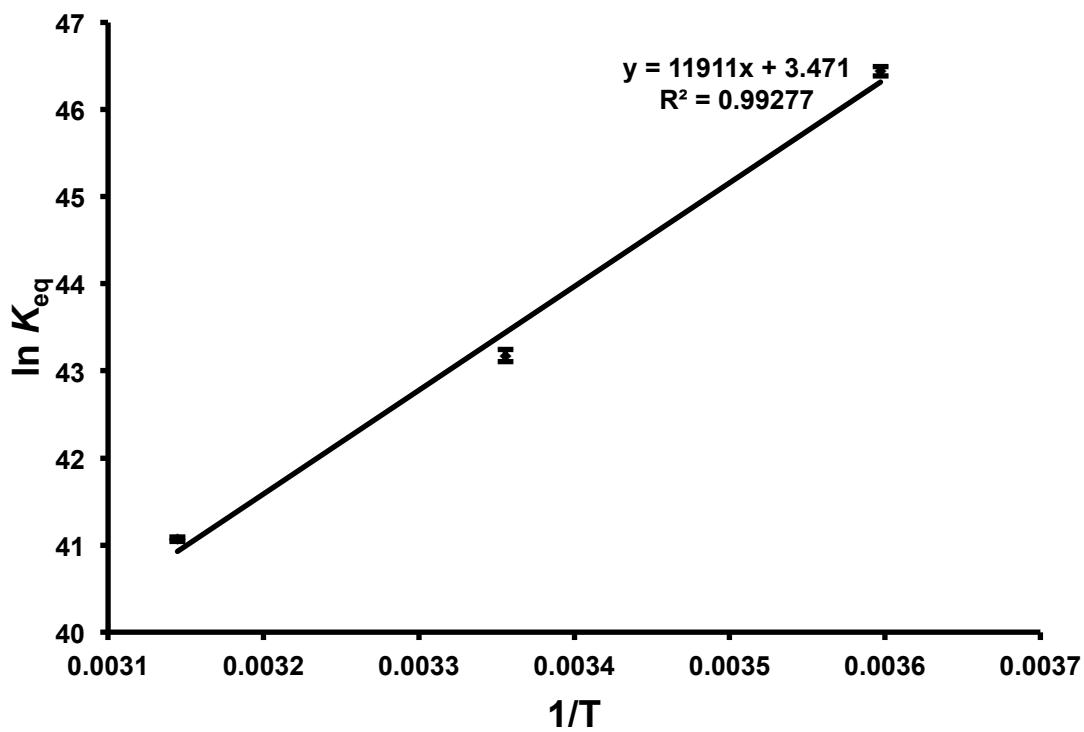

Figure S20. Van 't Hoff plot for  $\text{CuTREN}^{2+}$ .



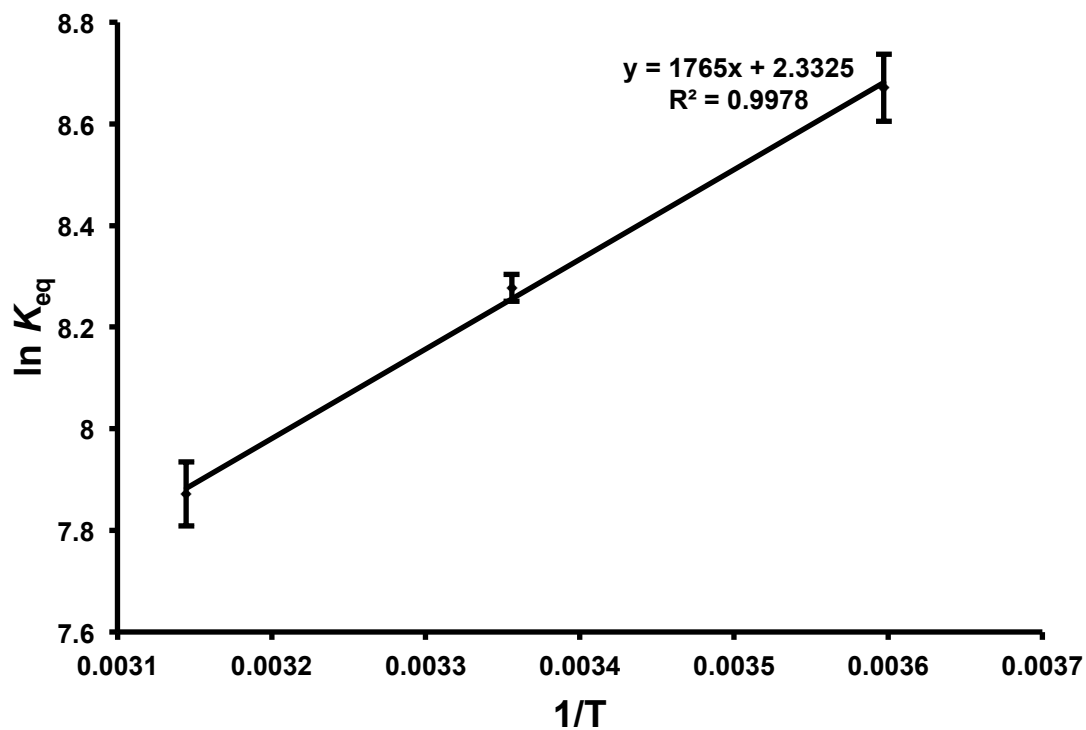

Figure S21. Van 't Hoff plot for CuTRENH<sup>3+</sup>.

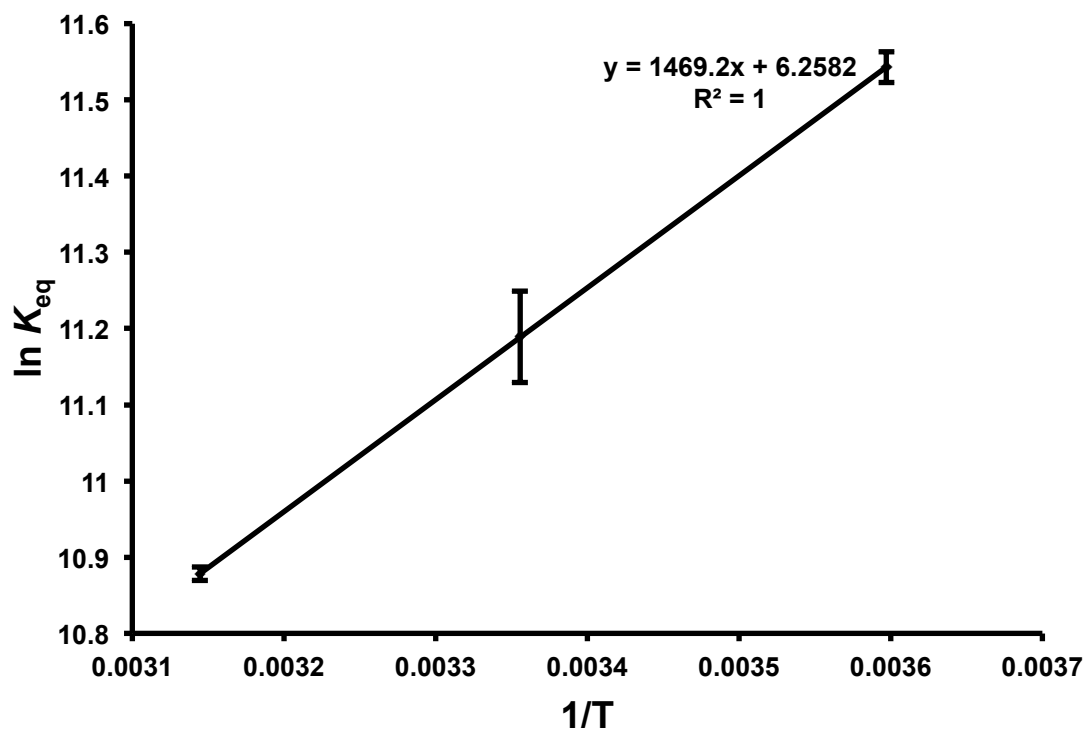

Figure S22. Van 't Hoff plot for 1H<sup>+</sup>.

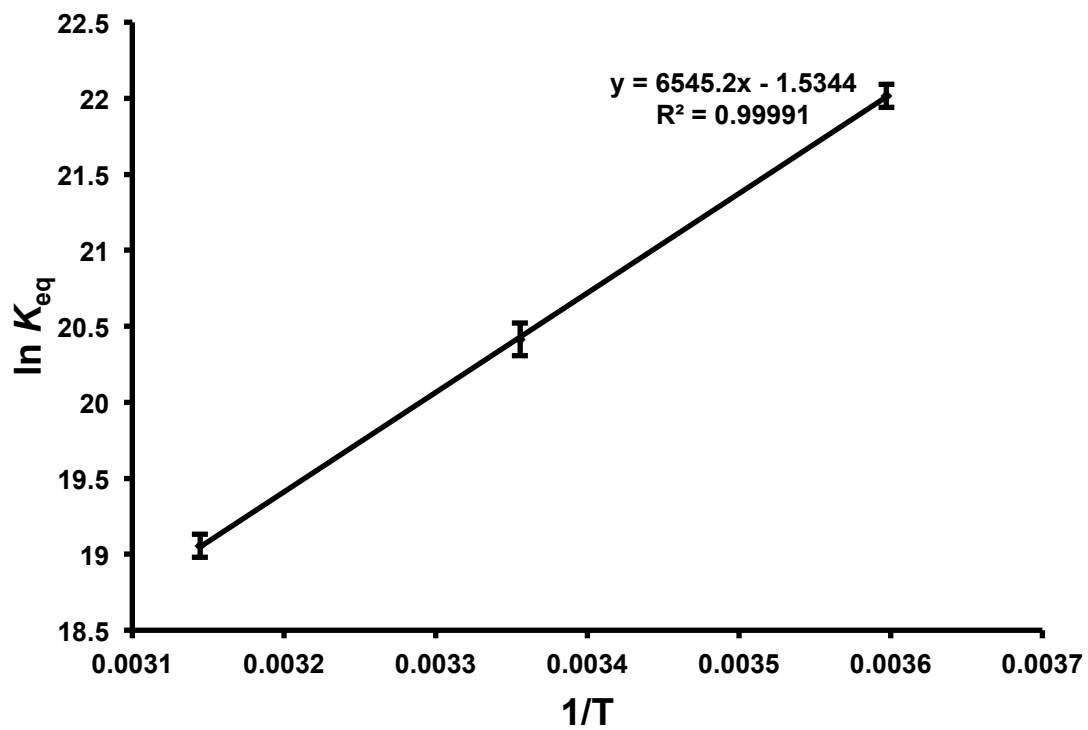

Figure S23. Van 't Hoff plot for Cu<sup>12+</sup>.
